# Supplementary material
Source: MDPI journal article supplement (https://www.mdpi.com/2311-7524/9/7/828)
Supplement: s1 [file s1]

**Table S1.** Analysis of variance (ANOVA) of the effect of C60 fulleranol in various concentrations into the soil on the agrochemical indicators of the state of the soil

| Trait                                  | df | MS     | F-value | P-value |
|----------------------------------------|----|--------|---------|---------|
| Ammonium nitrogen                      | 3  | 2.711  | 30.92   | 0.001   |
| Nitrate nitrogen                       | 3  | 0.077  | 71.00   | 0.001   |
| Phosphorus mobile in terms of $P_2O_5$ | 3  | 1817.0 | 37.54   | 0.001   |
| Potassium mobile in terms of $K_2O$    | 3  | 51.00  | 8.991   | 0.01    |
| Calcium exchangeable                   | 3  | 0.227  | 4.073   | 0.05    |
| Magnesium exchangeable                 | 3  | 1.657  | 691.7   | 0.001   |
| Iron mobile                            | 3  | 3.150  | 8.088   | 0.01    |
| Copper mobile                          | 3  | 0.003  | 21.20   | 0.001   |
| Zinc mobile                            | 3  | 3.292  | 128.8   | 0.001   |
| Manganese mobile                       | 3  | 0.963  | 7.349   | 0.01    |

**Table S2.** Analysis of variance (ANOVA) of the effect of C60 fulleranol in various concentrations into the soil on the studied traits of cucumber plants (hybrid F<sub>1</sub> Neva) grown under controlled conditions

| Trait                                                                                                  |                                     | df | MS       | F-value | P-value |
|--------------------------------------------------------------------------------------------------------|-------------------------------------|----|----------|---------|---------|
| Photosynthetic pigments content of cucumber plants leaves (hybrid F <sub>1</sub> Neva)                 |                                     |    |          |         |         |
| Chlorophyll a                                                                                          |                                     | 3  | 78.18    | 5.516   | 0.05    |
| Chlorophyll b                                                                                          |                                     | 3  | 13.59    | 6.980   | 0.01    |
| Total chlorophyll                                                                                      |                                     | 3  | 150.1    | 5.640   | 0.05    |
| Carotenoid                                                                                             |                                     | 3  | 7.646    | 5.563   | 0.05    |
| Biometric indicators of cucumber plants (hybrid F <sub>1</sub> Neva)                                   |                                     |    |          |         |         |
| Number of leaves                                                                                       |                                     | 3  | 0.170    | 1.889   | ns      |
| Leaves square                                                                                          |                                     | 3  | 443.9    | 7.91    | 0.01    |
| Stem cross-sectional area                                                                              |                                     | 3  | 3.328    | 3.568   | ns      |
| Leaves                                                                                                 | Raw mass                            | 3  | 0.1005   | 1.638   | ns      |
|                                                                                                        | Dry mass                            | 3  | 0.0092   | 1.490   | ns      |
|                                                                                                        | % dry matter                        | 3  | 3.128    | 48.1    | 0.001   |
| Stems                                                                                                  | Raw mass                            | 3  | 0.0255   | 0.510   | ns      |
|                                                                                                        | Dry mass                            | 3  | 0.0028   | 5.375   | 0.05    |
|                                                                                                        | % dry matter                        | 3  | 0.370    | 7.05    | 0.01    |
| Roots                                                                                                  | Raw mass                            | 3  | 0.0922   | 6.92    | 0.01    |
|                                                                                                        | Dry mass                            | 3  | 0.0222   | 15.10   | 0.001   |
|                                                                                                        | % dry matter                        | 3  | 0.500    | 12.50   | 0.01    |
| Content of antioxidant enzymes in the roots and leaves of cucumber plants (hybrid F <sub>1</sub> Neva) |                                     |    |          |         |         |
| Leaves                                                                                                 | POX activity of peroxidase          | 3  | 9.028    | 10.673  | 0.01    |
|                                                                                                        | CAT activity of catalase            | 3  | 6161     | 24.173  | 0.001   |
|                                                                                                        | LPO intensity of lipid peroxidation | 3  | 0.000025 | 73.83   | 0.001   |
| Roots                                                                                                  | POX activity of peroxidase          | 3  | 515.55   | 107.24  | 0.001   |
|                                                                                                        | CAT activity of catalase            | 3  | 1310.22  | 438.89  | 0.001   |
|                                                                                                        | LPO intensity of lipid peroxidation | 3  | 0.000007 | 15.331  | 0.001   |
| Content of the studied microelements in cucumber plants (hybrid F <sub>1</sub> Neva) and soil          |                                     |    |          |         |         |

|        |    |   |        |        |       |
|--------|----|---|--------|--------|-------|
| Leaves | Fe | 3 | 586.65 | 58.756 | 0.001 |
|        | Mn | 3 | 168.01 | 10.596 | 0.01  |
|        | Zn | 3 | 110.41 | 21.445 | 0.001 |
| Stems  | Fe | 3 | 384.93 | 31.565 | 0.001 |
|        | Mn | 3 | 141.49 | 10.331 | 0.01  |
|        | Zn | 3 | 90.17  | 21.958 | 0.001 |
| Roots  | Fe | 3 | 101.40 | 2.617  | ns    |
|        | Mn | 3 | 1053.1 | 33.817 | 0.001 |
|        | Zn | 3 | 831.39 | 69.117 | 0.001 |
| Soil   | Fe | 3 | 3.150  | 8.088  | 0.01  |
|        | Mn | 3 | 0.9635 | 7.349  | 0.01  |
|        | Zn | 3 | 3.2921 | 128.88 | 0.001 |

**Table S3.** Analysis of variance (ANOVA) of the effect of the introduction to the nutrient solution of mineral selenium-containing substances and their compositions with amino acid derivatives of C60 fullerene on biomass of edible part of Chinese cabbage plants cv. Daqingkou and on the selenium content in aerial parts and roots

| Trait            |                  | df | MS     | F-value | P-value |
|------------------|------------------|----|--------|---------|---------|
| Aboveground part | Raw mass         | 3  | 7911.2 | 553.51  | 0.001   |
|                  | Selenium content | 3  | 1206.2 | 109.00  | 0.001   |
| Roots            | Raw mass         | 3  | 578.42 | 562.79  | 0.001   |
|                  | Selenium content | 3  | 1010.9 | 68.098  | 0.001   |

**Table S4.** Analysis of variance (ANOVA) of the effect for foliar treatment with solutions of selenium-containing substances and compositions on fruit quality of tomato cv. Natasha

| Trait            | df | MS     | F-value | P-value |
|------------------|----|--------|---------|---------|
| % dry matter     | 3  | 0.1709 | 1.956   | ns      |
| Total saccharide | 3  | 49.68  | 11.849  | 0.01    |
| Monosaccharide   | 3  | 60.09  | 15.747  | 0.001   |
| Disaccharide     | 3  | 5.248  | 418.33  | 0.001   |
| Vitamin C        | 3  | 25.30  | 19.401  | 0.001   |
| Carotene         | 3  | 656.2  | 59.63   | 0.001   |

**Table S5.** Analysis of variance (ANOVA) of the effect of mono- and mixed solutions of fullerenol C<sub>60</sub> (1 mg/l) or C<sub>70</sub> (0.1 mg/l) and of zinc sulfate (160.0 mg/l) on some indicators of the quality of fruits in cucumber plants (hybrid F<sub>1</sub> Neva) fruits

| Trait        | df | MS      | F-value | P-value |
|--------------|----|---------|---------|---------|
| Raw ash      | 5  | 0.635   | 5.19    | 0.01    |
| N            | 5  | 0.0953  | 0.631   | ns      |
| P            | 5  | 0.00225 | 0.0796  | ns      |
| K            | 5  | 0.2293  | 1.953   | ns      |
| Ca           | 5  | 0.0170  | 6.623   | 0.01    |
| Mg           | 5  | 0.00089 | 0.921   | ns      |
| Fe           | 5  | 971.75  | 49.66   | 0.001   |
| Mn           | 5  | 27.14   | 3.003   | ns      |
| Cu           | 5  | 143.42  | 772.7   | 0.001   |
| Zn           | 5  | 122.50  | 829.9   | 0.001   |
| % dry matter | 5  | 0.0960  | 0.096   | ns      |
| Vitamin C    | 5  | 0.545   | 0.545   | ns      |

|                  |   |        |        |       |
|------------------|---|--------|--------|-------|
| Nitrates         | 5 | 4124.9 | 4124.9 | 0.001 |
| Total saccharide | 5 | 11.09  | 11.09  | ns    |
| Monosaccharide   | 5 | 19.04  | 19.04  | ns    |
| Disaccharide     | 5 | 1.5080 | 1.508  | 0.001 |

**Table S6.** Analysis of variance (ANOVA) of the effect of mono- and mixed solutions of fullerenol C<sub>60</sub> (1 mg/l) or C<sub>70</sub> (0.1 mg/l) and of zinc sulfate (160.0 mg/l) on growth indicators of cucumber plants (hybrid F<sub>1</sub> Neva) fruits

| Trait                     |              | df | MS     | F-value | P-value |
|---------------------------|--------------|----|--------|---------|---------|
| Leaves square             |              | 5  | 300926 | 6.132   | 0.01    |
| Stem cross-sectional area |              | 5  | 62389  | 6.465   | 0.01    |
| Leaves                    | Raw mass     | 5  | 254    | 0.1037  | ns      |
|                           | Dry mass     | 5  | 8.57   | 0.755   | ns      |
|                           | % dry matter | 5  | 0.557  | 3.98    | 0.05    |
| Stems                     | Raw mass     | 5  | 456    | 0.666   | ns      |
|                           | Dry mass     | 5  | 10.589 | 1.7421  | ns      |
|                           | % dry matter | 5  | 0.4970 | 7.646   | 0.01    |
